# Supplementary material
Source: Springer Nature journal article supplement (https://www.springermedizin.de/resource/supplementary/12885_2007_1136_MOESM2_ESM.pdf/9471202)

Pre-wash

Post-wash

Post-incubation (16 h)

Trypan Blue  
Staining

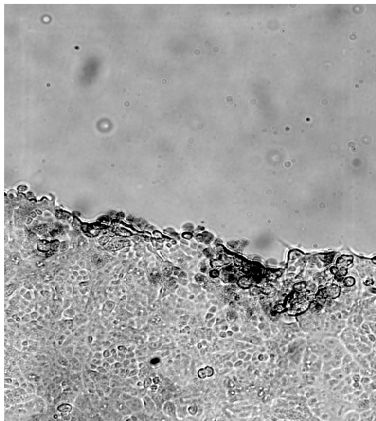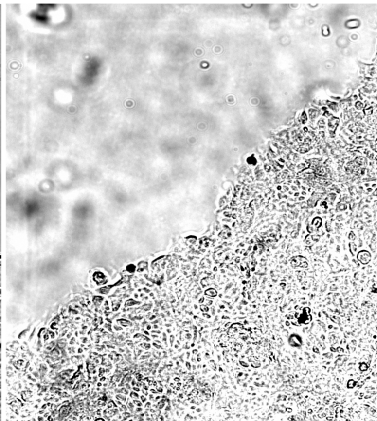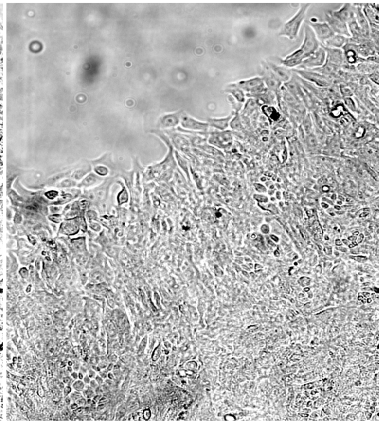

Supplement: MOESM2 [file 9471202]
